# Supplementary material for: Five-year follow-up of ZUMA-1 supports the curative potential of axicabtagene ciloleucel in refractory large B-cell lymphoma
Source: PubMed Central journal article supplement — Blood. 2023 Feb 26;141(19):2307–15. doi: 10.1182/blood.2022018893 (PMC10646788; doi:10.1182/blood.2022018893), 2023-02-26
Supplement: BLOOD_BLD-2022-018893-mmc1.pdf [file BLOOD_BLD-2022-018893-mmc1.pdf]

**5-Year Follow-Up Supports Curative Potential of Axicabtagene Ciloleucel in Refractory Large B-Cell Lymphoma (ZUMA-1)**

**Neelapu, et al.**

**SUPPLEMENTAL DATA**

Supplemental Methods ..... 2  
    Biomarker analyses..... 2  
Figure S1. Duration of Response by Complete Response at or After Week 4 Postinfusion. .... 3  
Figure S2. Subgroup Analysis of Median Event-Free Survival..... 4  
Figure S3. Time to Next Therapy. .... 5  
Figure S4. Overall Survival by Event-Free Survival at 12 and 24 Months ..... 6  
Figure S5. B-Cell Recovery and Diversity. .... 7  
Table S1. Progression-Free and Overall Survival by Response at 3, 6, 12, and 24 Months ..... 8  
Table S2. Secondary Malignancies ..... 9  
Table S3. Summary of B-Cell Aplasia by Ongoing Response at 60 Months ..... 10

## Supplemental Methods

### *Biomarker analyses*

The presence, expansion, and persistence of axi-cel anti-CD19 chimeric antigen receptor (CAR) T cells were measured in peripheral blood mononuclear cells (PBMCs) as previously reported.<sup>1</sup> Briefly, a quantitative polymerase chain reaction assay observed concentration peak anti-CD19 CAR T cells/ $\mu\text{L}$ , the area under the curve (AUC) from Day 0 to Day 28 ( $\text{AUC}_{0-28}$ ). B cells were characterized in cryopreserved PBMCs using multicolor flow cytometry. Viable cells were calculated as a percentage of the total number of viable CD45+ leukocytes. B-cell subsets were defined as CD45+CD3-CD14-CD16-CD56-CD19+ and/or CD20+ and further phenotyped as follows: Ig kappa, Ig lambda, class-switched memory (CD20+CD27+IgD-), non-class-switched memory (CD20+CD27+IgD+), naive (CD20+CD27-IgD+CD24<sup>low</sup>CD38<sup>low</sup>), plasmablasts (CD38<sup>high</sup>CD20-), and transitional (CD20+CD27-IgD+CD24+CD38<sup>mid</sup>).

**Figure S1. Duration of Response by Complete Response at or After Week 4 Postinfusion.**

This figure shows Kaplan-Meier estimates of DOR in treated patients with LBCL (n=101) in Cohorts 1 and 2 of phase 2 who had a complete response to axi-cel, either at the week 4 disease assessment or afterward. Axi-cel, axicabtagene ciloleucel; CR, complete response; DOR, duration of response; LBCL, large B-cell lymphoma; NE, not estimable.

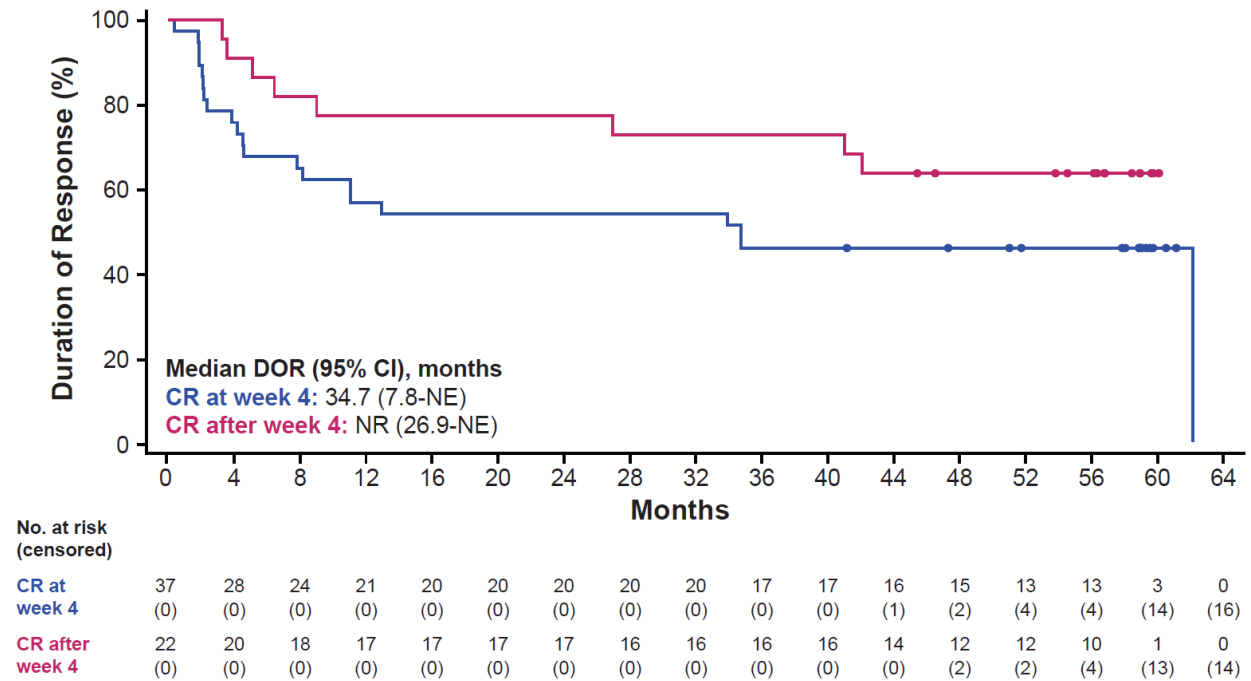

**Figure S2. Subgroup Analysis of Median Event-Free Survival.**

Figure shows a subgroup analysis of the median EFS in patients treated with axi-cel (n=101) by key patient baseline and clinical covariates. The Clopper–Pearson method was used to calculate the 95% CI. Axi-cel, axicabtagene ciloleucel; DLBCL, diffuse large B-cell lymphoma; EFS, event-free survival; NE, not estimable; PMBCL, primary mediastinal large B-cell lymphoma; TFL, transformed follicular lymphoma.

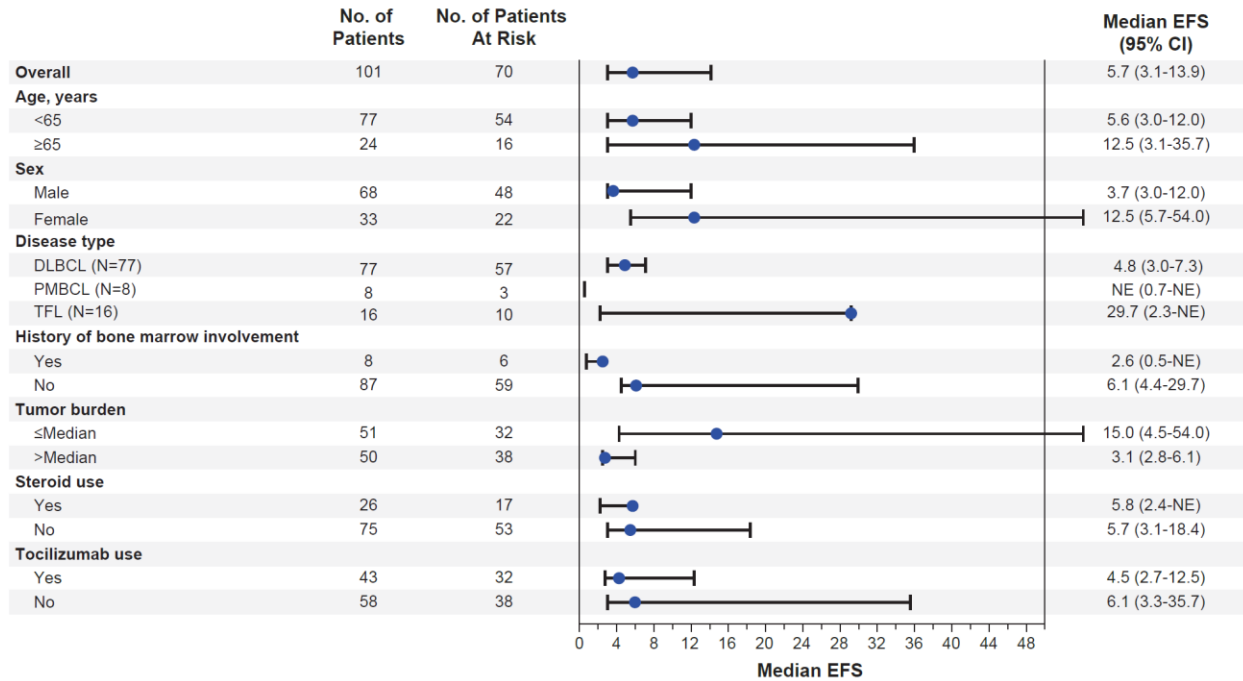

**Figure S3. Time to Next Therapy.**

This figure shows a Kaplan Meier estimate of time to next therapy among 101 patients with LBCL treated with axi-cel in Cohorts 1 and 2 of phase 2. Axi-cel, axicabtagene ciloleucel; LBCL, large B-cell lymphoma; NE, not estimable.

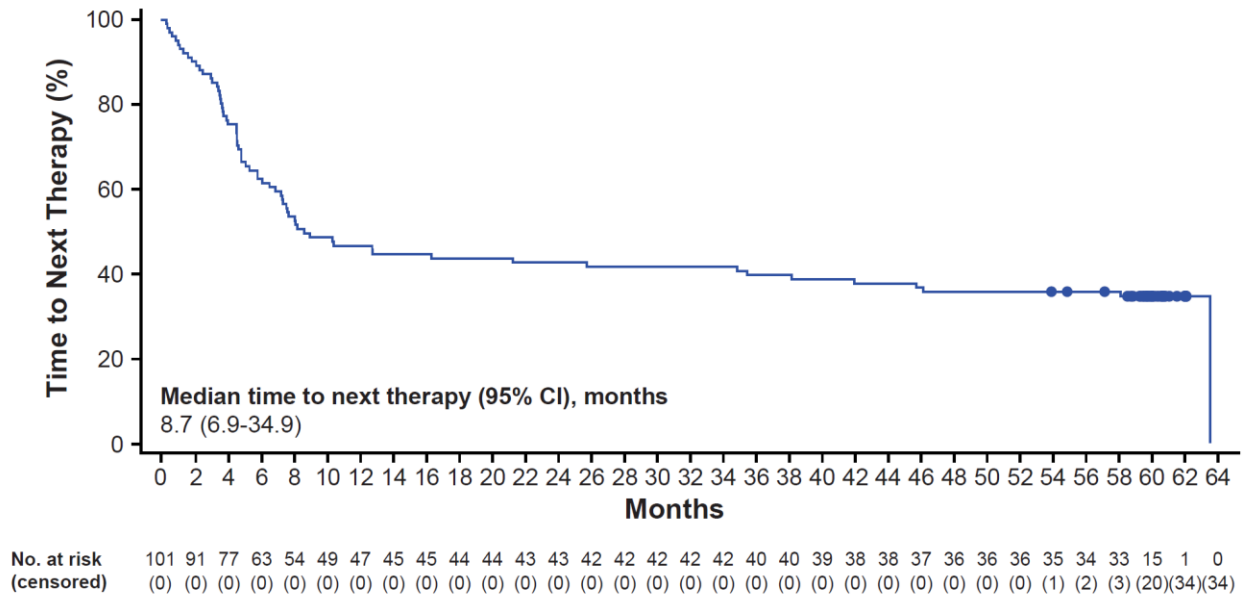

**Figure S4. Overall Survival by Event-Free Survival at 12 and 24 Months**

This figure shows a Kaplan Meier estimate of OS among 101 patients with LBCL treated with axi-cel in Cohorts 1 and 2 of phase 2, assessed by EFS events by months 12 and 24. Axi-cel, axicabtagene ciloleucel; EFS, event-free survival; LBCL, large B-cell lymphoma; NE, not estimable; OS, overall survival.

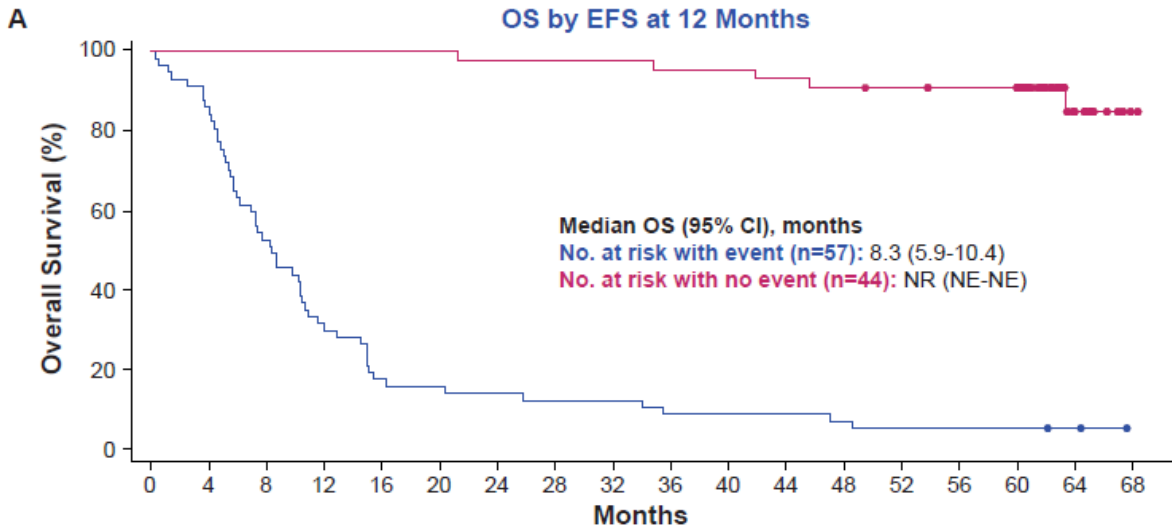

|                                             |     |     |     |     |     |     |     |     |     |     |     |     |     |     |     |     |      |      |
|---------------------------------------------|-----|-----|-----|-----|-----|-----|-----|-----|-----|-----|-----|-----|-----|-----|-----|-----|------|------|
| <b>No. at risk with event (censored)</b>    | 57  | 49  | 30  | 17  | 10  | 9   | 8   | 7   | 7   | 5   | 5   | 5   | 4   | 3   | 3   | 3   | 2    | 0    |
|                                             | (0) | (0) | (0) | (0) | (0) | (0) | (0) | (0) | (0) | (0) | (0) | (0) | (0) | (0) | (0) | (0) | (1)  | (3)  |
| <b>No. at risk with no event (censored)</b> | 44  | 44  | 44  | 44  | 44  | 44  | 43  | 43  | 43  | 42  | 42  | 41  | 40  | 39  | 38  | 38  | 12   | 1    |
|                                             | (0) | (0) | (0) | (0) | (0) | (0) | (0) | (0) | (0) | (0) | (0) | (0) | (0) | (1) | (2) | (2) | (27) | (38) |

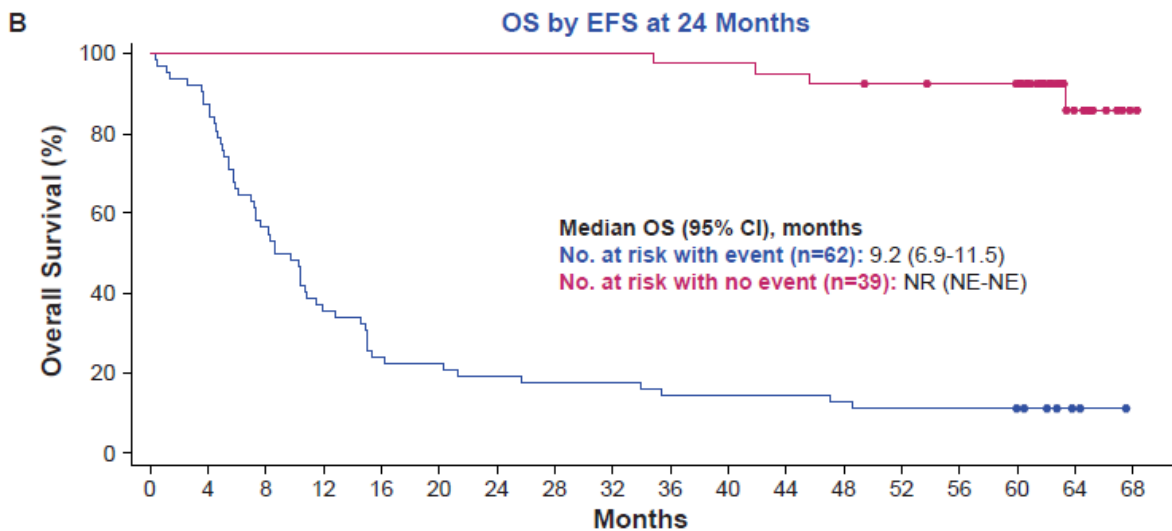

|                                             |     |     |     |     |     |     |     |     |     |     |     |     |     |     |     |     |      |      |
|---------------------------------------------|-----|-----|-----|-----|-----|-----|-----|-----|-----|-----|-----|-----|-----|-----|-----|-----|------|------|
| <b>No. at risk with event (censored)</b>    | 62  | 54  | 35  | 22  | 15  | 14  | 12  | 11  | 11  | 9   | 9   | 9   | 8   | 7   | 7   | 7   | 2    | 0    |
|                                             | (0) | (0) | (0) | (0) | (0) | (0) | (0) | (0) | (0) | (0) | (0) | (0) | (0) | (0) | (0) | (0) | (5)  | (7)  |
| <b>No. at risk with no event (censored)</b> | 39  | 39  | 39  | 39  | 39  | 39  | 39  | 39  | 39  | 38  | 38  | 37  | 36  | 35  | 34  | 34  | 12   | 1    |
|                                             | (0) | (0) | (0) | (0) | (0) | (0) | (0) | (0) | (0) | (0) | (0) | (0) | (0) | (1) | (2) | (2) | (23) | (34) |

**Figure S5. B-Cell Recovery and Diversity.**

This figure shows CD19 positive and or CD20 positive B-cell levels by Ig kappa and lambda subtypes as well as B-cell diversity by class at 3-years postinfusion. Ig, immunoglobulin.

**B-Cell Recovery**

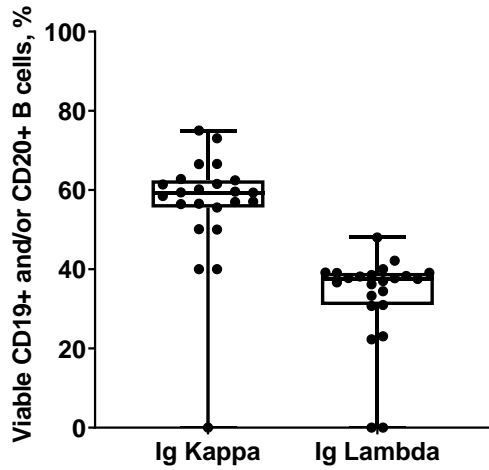

**B-Cell Diversity**

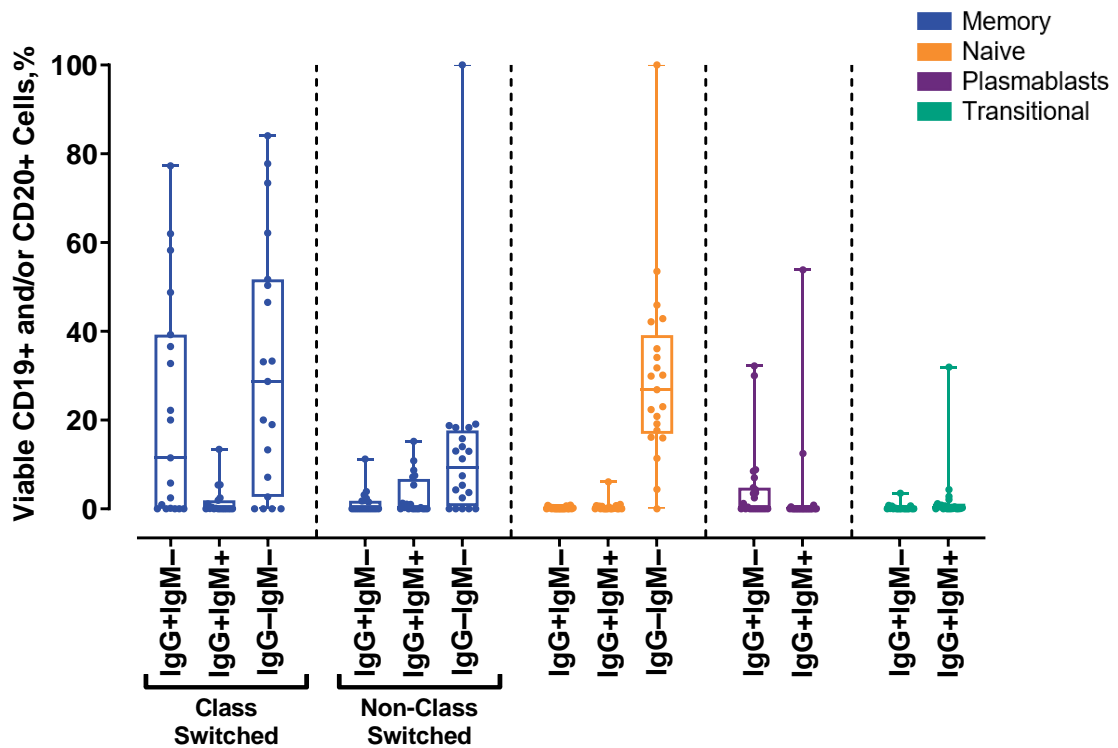

**Table S1. Progression-Free and Overall Survival by Response at 3, 6, 12, and 24 Months**

|                                                   | <b>Month 3<br/>N=97</b> | <b>Month 6<br/>N=94</b> | <b>Month 12<br/>N=95</b> | <b>Month 24<br/>N=95</b> |
|---------------------------------------------------|-------------------------|-------------------------|--------------------------|--------------------------|
| <b>N, median PFS (95% CI) by response, months</b> |                         |                         |                          |                          |
| CR                                                | n=42<br>63.4 (35.6-NE)  | n=39<br>63.4 (NE-NE)    | n=39<br>63.4 (NE-NE)     | n=36<br>63.4 (NE-NE)     |
| PR                                                | n=10<br>54.0 (4.4-NE)   | n=4<br>NR (54.0-NE)     | n=1<br>54.0 (NE-NE)      | n=1<br>54.0 (NE-NE)      |
| SD                                                | n=7<br>7.3 (3.7-18.4)   | n=1<br>18.4 (NE-NE)     | -                        | -                        |
| PD                                                | n=38<br>2.6 (1.9-2.8)   | n=50<br>2.8 (2.4-3.0)   | n=55<br>3.0 (2.7-3.1)    | n=58<br>3.0 (2.8-3.3)    |
| <b>Median OS (95% CI) by response, months</b>     |                         |                         |                          |                          |
| CR                                                | n=42<br>NR (63.4-NE)    | n=39<br>NR (NE-NE)      | n=39<br>NR (NE-NE)       | n=36<br>NR (NE-NE)       |
| PR                                                | n=10<br>NR (7.7-NE)     | n=4<br>NR (NE-NE)       | n=1<br>NR (NE-NE)        | n=1<br>NR (NE-NE)        |
| SD                                                | n=7<br>10.9 (7.3-NE)    | n=1<br>NR (NE-NE)       | -                        | -                        |
| PD                                                | n=38<br>6.5 (5.1-10.3)  | n=50<br>8.5 (5.9-10.7)  | n=55<br>8.7 (6.9-10.9)   | n=58<br>10.0 (7.3-12.0)  |

CR, complete response; NE, not estimable; NR, not reached; OS, overall survival; PD, progressive disease; PFS, progression-free survival; PR, partial response; SD, stable disease.



**Table S2. Secondary Malignancies**

| N (%)                          | Treated Patients (N=101) |
|--------------------------------|--------------------------|
| Patients with a new malignancy | 5 (5)                    |
| Non-melanoma skin cancer       | 2 (2)                    |
| t-MDS*                         | 3 (3)                    |

\*t-MDS are events of MDS that have been identified as being likely related to prior chemotherapy (ie, chemotherapy before axi-cel infusion or the first dose of study drug).

MDS, myelodysplastic syndrome; t-MDS, treatment-related myelodysplastic syndrome.

**Table S3. Summary of B-Cell Aplasia by Ongoing Response at 60 Months**

|                                   | Ongoing Response | Relapsed  | Nonresponder |
|-----------------------------------|------------------|-----------|--------------|
| n (%)                             | (n=29)           | (n=51)    | (N=17)       |
| <b>B cells tested at Baseline</b> | 23 (79.3)        | 41 (80.4) | 9 (52.9)     |
| No B cells                        | 11 (47.8)        | 27 (65.9) | 6 (66.7)     |
| With B cells                      | 12 (52.2)        | 14 (34.2) | 3 (33.3)     |
| <b>B cells tested at Month 3</b>  | 27 (93.1)        | 44 (86.3) | 6 (35.3)     |
| No B cells                        | 21 (77.8)        | 33 (75.0) | 4 (66.7)     |
| With B cells                      | 5 (18.5)         | 9 (20.5)  | 2 (33.3)     |
| Undetermined                      | 1 (3.7)          | 2 (4.6)   | –            |
| <b>B cells tested at Month 6</b>  | 24 (82.8)        | 27 (52.9) | 1 (5.9)      |
| No B cells                        | 19 (79.2)        | 21 (77.8) | –            |
| With B cells                      | 5 (20.8)         | 5 (18.5)  | 1 (100)      |
| Undetermined                      | –                | 1 (3.7)   | –            |
| <b>B cells tested at Month 9</b>  | 25 (86.2)        | 20 (39.2) | 1 (5.9)      |
| No B cells                        | 10 (40.0)        | 9 (45.0)  | 1 (100)      |
| With B cells                      | 15 (60.0)        | 11 (55.0) | –            |
| <b>B cells tested at Month 12</b> | 26 (89.7)        | 15 (29.4) | –            |
| No B cells                        | 13 (50.0)        | 7 (46.7)  | –            |
| With B cells                      | 13 (50.0)        | 8 (53.3)  | –            |
| <b>B cells tested at Month 15</b> | 27 (93.1)        | 12 (23.5) | –            |
| No B cells                        | 10 (37.0)        | 6 (50.0)  | –            |
| With B cells                      | 17 (63.0)        | 6 (50.0)  | –            |
| <b>B cells tested at Month 18</b> | 23 (79.3)        | 11 (21.6) | –            |
| No B cells                        | 7 (30.4)         | 5 (45.5)  | –            |
| With B cells                      | 16 (69.6)        | 6 (54.6)  | –            |
| <b>B cells tested at Month 24</b> | 25 (86.2)        | 8 (15.7)  | –            |
| No B cells                        | 7 (28.0)         | 1 (12.5)  | –            |
| With B cells                      | 18 (72.0)        | 7 (87.5)  | –            |

## REFERENCE

1. Locke FL, Neelapu SS, Bartlett NL, et al: Phase 1 results of ZUMA-1: a multicenter study of KTE-C19 anti-CD19 CAR T cell therapy in refractory aggressive lymphoma. *Mol Ther* 25:285-295, 2017
